# Supplementary material for: Eddy-induced chlorophyll profile characteristics and underlying dynamic mechanisms in the South Pacific Ocean
Source: Copernicus journal article supplement (doi:10.5194/egusphere-2023-1735), 2023-08-22
Supplement: Supplementary file [file egusphere-2023-1735-AC1-supplement.zip]

# Supporting Information

for

## Eddy-induced chlorophyll profile characteristics and underlying dynamic mechanisms in the South Pacific Ocean

Meng Hou <sup>1</sup>, Jie Yang <sup>1,2,\*</sup>, Ge Chen <sup>1,2</sup>, Guiyan Han <sup>1</sup>, Yan Wang <sup>1</sup> and Kai Wu <sup>1</sup>

<sup>1</sup>School of Marine Technology, Frontiers Science Center for Deep Ocean Multispheres and Earth System, Academy of the Future Ocean, Ocean University of China, Qingdao 266100, China

<sup>2</sup>Laboratory for Regional Oceanography and Numerical Modeling, Laoshan Laboratory, Qingdao 266100, China

\*Correspondence to: Jie Yang (yangjie2016@ouc.edu.cn)

### Contents of this file

Figures S1 to S5

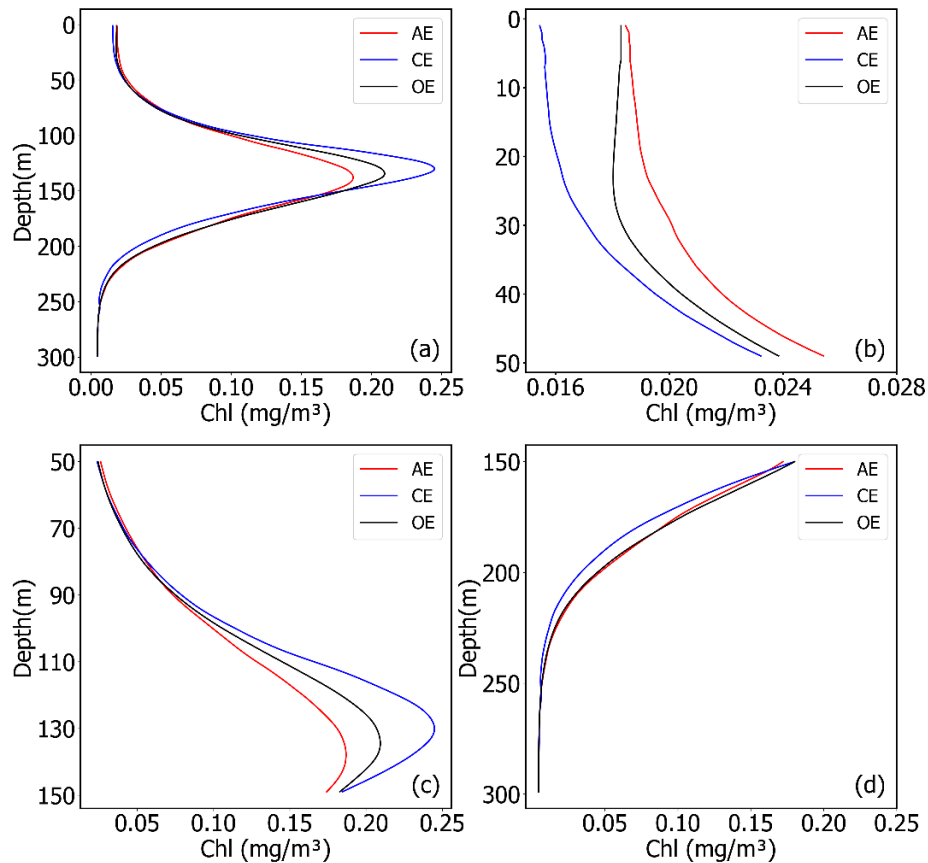

Fig. S1 Profiles of Chl in eddies of different polarity at different depths, red blue and black lines indicate that the profile is in AEs, CEs and OE, respectively. (a) 0-300m, (b) 0-50m, (c) 50-150m, (d) 150-300m.

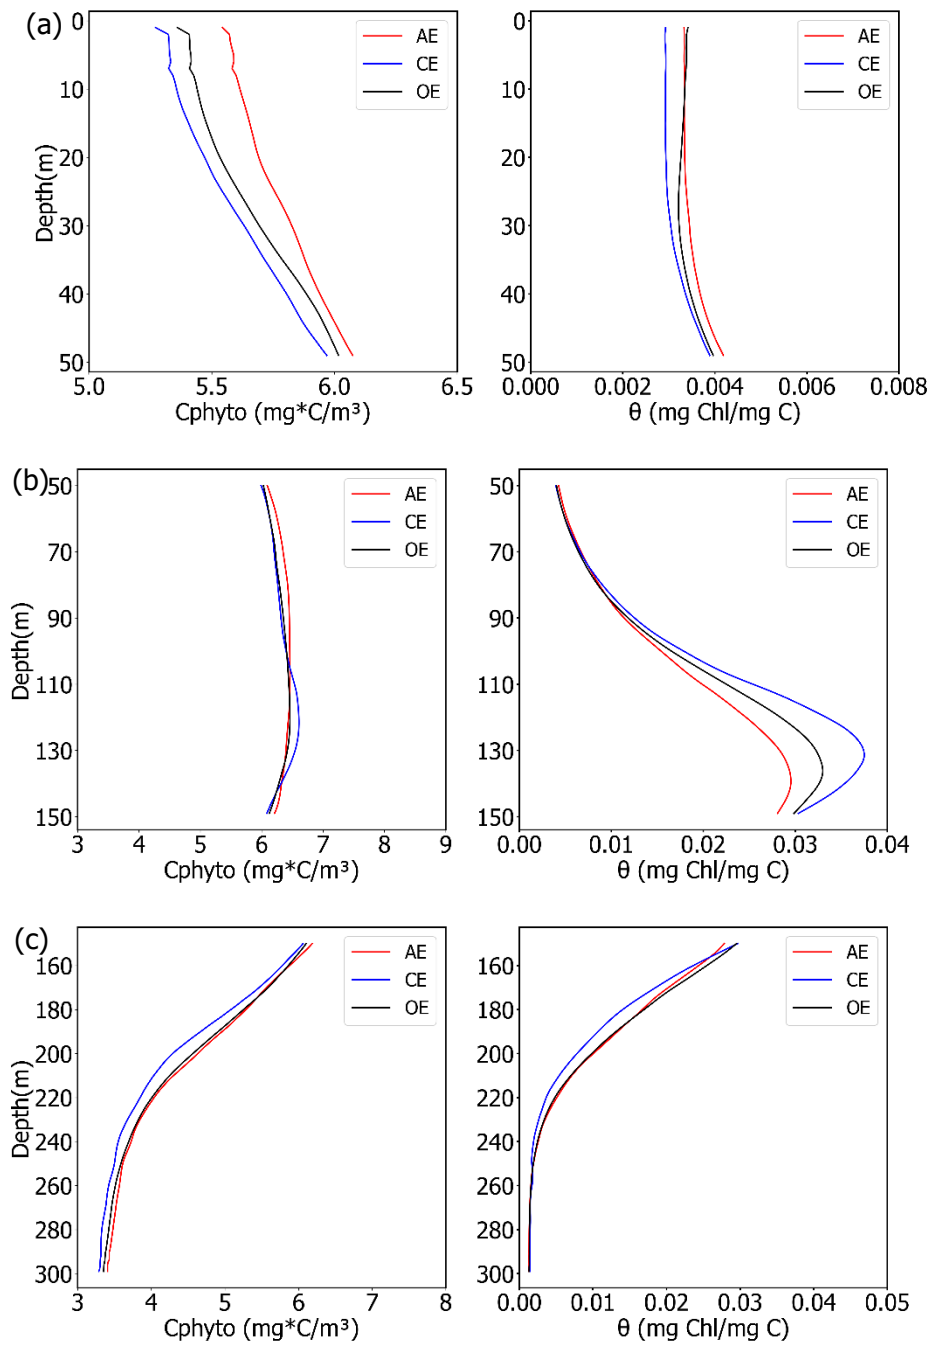

Fig. S2 Profiles of  $C_{phyto}$  and  $\theta$  in eddies of different polarity at different depths, red blue and black lines indicate that the profile is in AEs, CEs and OE, respectively. (a) 0-50m, (b) 50-150m, (c) 150-300m.

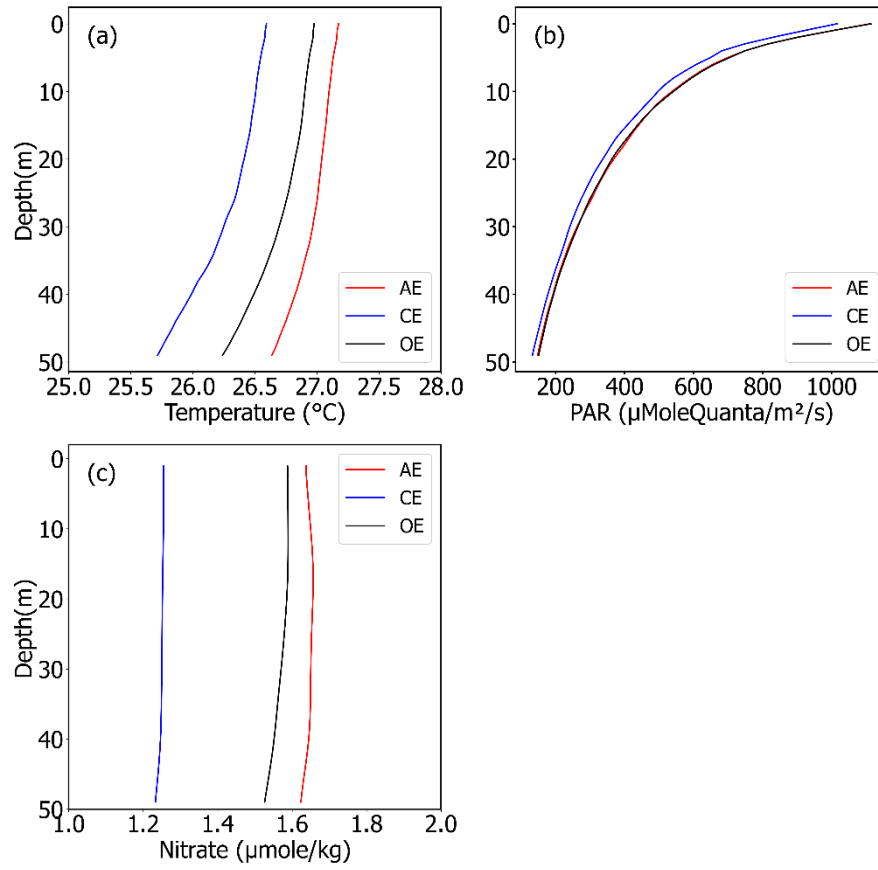

Fig. S3 (a, b and c) Profiles of Temperature, PAR and Nitrate in eddies of different polarity in 0-50m, red blue and black lines indicate that the profile is in AEs, CEs and OE, respectively.

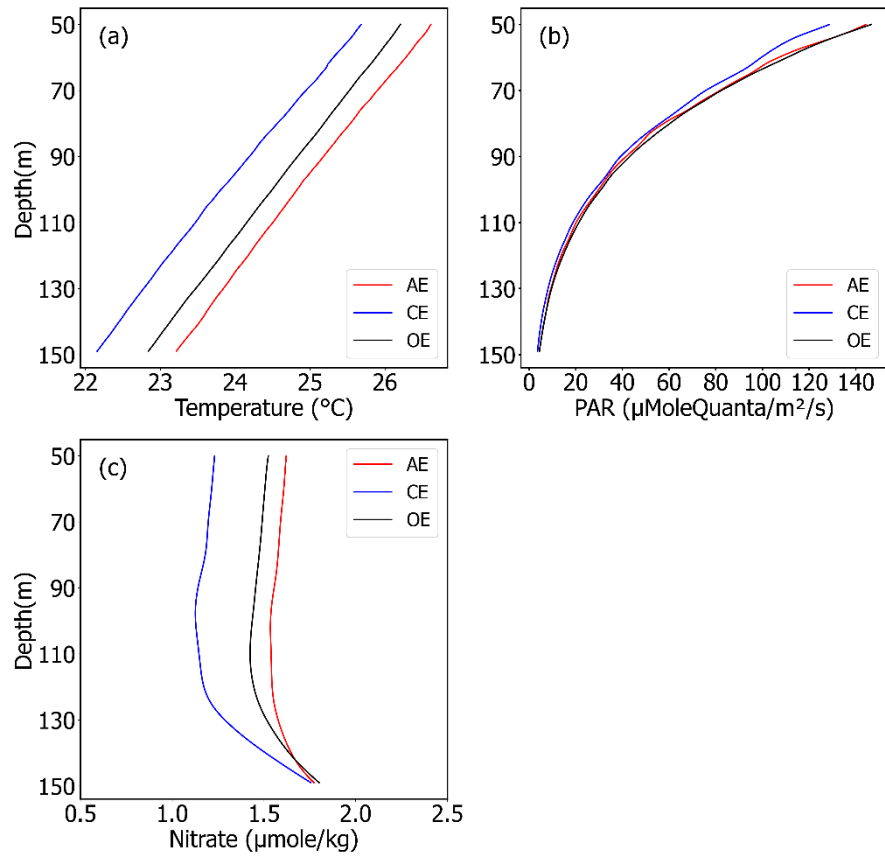

Fig. S4 (a, b and c) Profiles of Temperature, PAR and Nitrate in eddies of different polarity in 50-150m, red blue and black lines indicate that the profile is in AEs, CEs and OE, respectively.

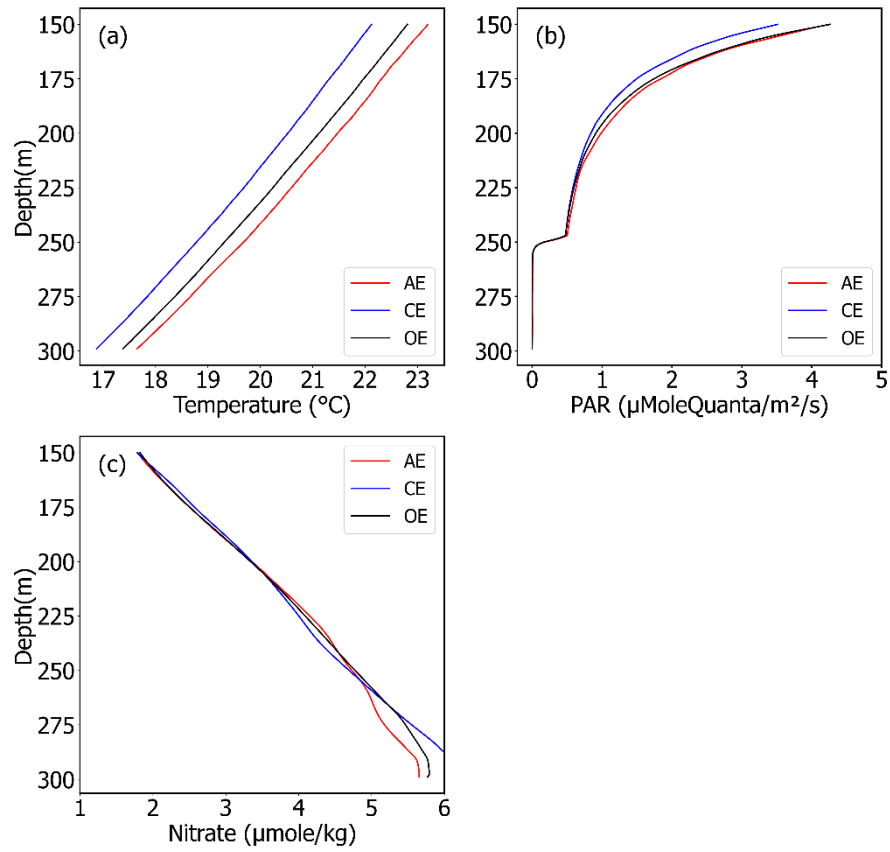

Fig. S5 (a, b and c) Profiles of Temperature, PAR and Nitrate in eddies of different polarity in 150-300m, red blue and black lines indicate that the profile is in AEs, CEs and OE, respectively.
